# Supplementary material for: High Throughput Screening of FDA-Approved Drug Library Reveals the Compounds that Promote IRF3-Mediated Pro-Apoptotic Pathway Inhibit Virus Replication
Source: MDPI journal article supplement (doi:10.3390/v12040442), 2020-04-14
Supplement: s1 [file s1]

| polyI:C + drugs |       |          |          |          |          |                     |          |          |          |                     |          |          |         |       |  |
|-----------------|-------|----------|----------|----------|----------|---------------------|----------|----------|----------|---------------------|----------|----------|---------|-------|--|
|                 |       |          | B1       | B2       | B3       | B4                  | B5       | B6       | B7       | B8                  | B9       | B10      |         |       |  |
| polyI:C         | Row-1 | 15486.25 | 11436.25 | 10155.25 | 11077.25 | 13662.25            | 12292.25 | 12870.25 | 9388.25  | 16937.25            | 13319.25 | 10763.25 | 862.25  | NT    |  |
|                 | Row-2 | 13526.25 | 11951.25 | 11067.25 | 12413.25 | 17445.25            | 11086.25 | 12362.25 | 10075.25 | 9971.25             | 11467.25 | 11726.25 | 1012.25 |       |  |
|                 | Row-3 | 13354.25 | 12284.25 | 12145.25 | 10721.25 | 11640.25            | 11014.25 | 13267.25 | 9957.25  | 10953.25            | 12448.25 | 9047.25  | 1027.25 |       |  |
|                 | Row-4 | 12222.25 | 11223.25 | 10586.25 | 10911.25 | 11959.25            | 22731.25 | 13016.25 | 12568.25 | 11746.25            | 11543.25 | 6871.25  | 852.25  |       |  |
| polyI:C / DMSO  | Row-5 | 14813.25 | 12151.25 | 15527.25 | 8505.25  | 10944.25            | 10335.25 | 9665.25  | 12630.25 | 8629.25             | 9994.25  | 8630.25  | 0       | Media |  |
|                 | Row-6 | 11695.25 | 13181.25 | 10188.25 | 7953.25  | 11021.25            | 9870.25  | 10748.25 | 11200.25 | 9588.25             | 10563.25 | 9631.25  | 0       |       |  |
|                 | Row-7 | 13836.25 | 11534.25 | 9406.25  | 10609.25 | 13729.25            | 11074.25 | 9637.25  | 12470.25 | 10987.25            | 10265.25 | 13302.25 | 0       |       |  |
|                 | Row-8 | 16112.25 | 9464.25  | 9926.25  | 9417.25  | 10110.25            | 11145.25 | 5084.25  | 10876.25 | 10080.25            | 11572.25 | 11490.25 | 0       |       |  |
|                 |       |          |          |          |          | Potential activator |          |          |          | Potential inhibitor |          |          |         |       |  |

Figure S1

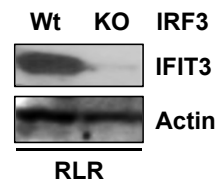

**Figure S2**

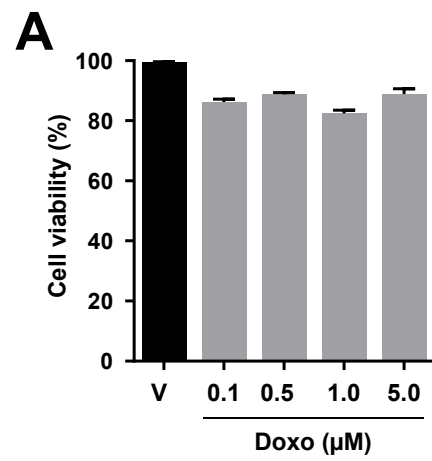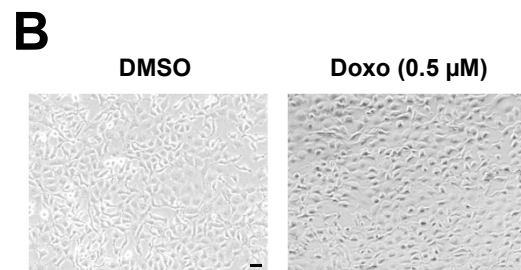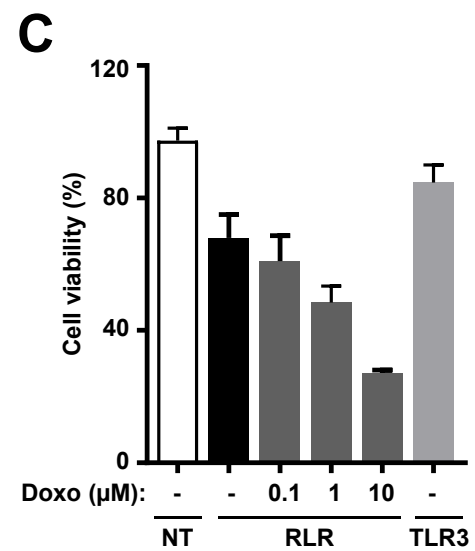

**Figure S3**
