# Supplementary material for: High Throughput Screening of FDA-Approved Drug Library Reveals the Compounds that Promote IRF3-Mediated Pro-Apoptotic Pathway Inhibit Virus Replication
Source: MDPI journal article supplement (doi:10.3390/v12040442), 2020-04-14
Supplement: s1 [file s1]

**TABLE S1.** Caspase activity of the primary screening plates. MDA-MB-453 cells were transfected with polyI:C in the absence or the presence of the drugs, as described in Fig 1F. Caspase-3 activity of each well is indicated after normalizing to the vehicle (DMSO) control, which was considered as 100.

| Compounds                                 | Caspase activity |
|-------------------------------------------|------------------|
| Merbromin                                 | 3507.8184        |
| Thiopropazine dimesylate                  | 537.7076         |
| Topotecan                                 | 470.294973       |
| Perphenazine                              | 408.521          |
| Pyruvium pamoate                          | 378.4462014      |
| Loperamide hydrochloride                  | 351.1279         |
| Nicergoline                               | 321.3263         |
| Oxandrolone                               | 309.6642         |
| Doxorubicin hydrochloride                 | 305.4625         |
| Acemetacin                                | 292.5202         |
| Proguanil hydrochloride                   | 287.2808525      |
| Canrenoic acid potassium salt             | 274.5111         |
| Methotrexate                              | 266.0738         |
| Cyproheptadine hydrochloride              | 260.3053         |
| Dantrolene sodium salt                    | 258.95765        |
| Pimethixene maleate                       | 258.3525         |
| Labetalol hydrochloride                   | 256.72325        |
| Mianserine hydrochloride                  | 255.8156         |
| Chenodiol                                 | 253.6044         |
| N6-methyladenosine                        | 253.30538        |
| Vinpocetine                               | 249.8804         |
| Chloroxine                                | 249.8664         |
| Celecoxib                                 | 247.9434981      |
| Disulfiram                                | 247.9343         |
| Isoconazole                               | 246.5999         |
| Clotrimazole                              | 244.06165        |
| Cyproterone acetate                       | 242.3004988      |
| Trimeprazine tartrate                     | 241.1924         |
| Gallamine triethiodide                    | 239.08           |
| Tetraethylenepentamine pentahydrochloride | 236.276151       |
| Cilnidipine                               | 236.1445783      |
| Alprenolol hydrochloride                  | 235.49645        |
| Cloperastine hydrochloride                | 234.9486         |
| Glafenine hydrochloride                   | 230.00355        |
| Pergolide mesylate                        | 226.83815        |
| Benzylamine hydrochloride                 | 224.7434         |
| Desloratadine                             | 223.6809306      |

|                                        |             |
|----------------------------------------|-------------|
| Adenosine 5'-monophosphate monohydrate | 223.64926   |
| Econazole nitrate                      | 222.2297    |
| Pranoprofen                            | 221.834914  |
| Retinoic acid                          | 221.7642    |
| Chlormadinone acetate                  | 221.4162943 |
| Bumetanide                             | 221.2987    |
| Vardenafil                             | 220.6896552 |
| Zotepine                               | 220.57      |
| Trimipramine maleate salt              | 220.2116    |
| Rifapentine                            | 219.9575    |
| Glibenclamide                          | 219.9022    |
| Methotrimeprazine maleate salt         | 218.3112    |
| Loxapine succinate                     | 217.5906    |
| Triamcinolone                          | 216.5064    |
| Niflumic acid                          | 216.13165   |
| Fenoterol hydrobromide                 | 216.0851    |
| Gentamicine sulfate                    | 214.4214    |
| Zidovudine, AZT                        | 214.34882   |
| Secnidazole                            | 214.180228  |
| 5-fluorouracil                         | 213.7100125 |
| Pirlindole mesylate                    | 212.7535235 |
| Glutethimide, para-amino               | 212.59385   |
| Vincamine                              | 210.5922    |
| Norethindrone                          | 209.70775   |
| Ambroxol hydrochloride                 | 208.90894   |
| Quinidine hydrochloride monohydrate    | 208.68365   |
| Guanfacine hydrochloride               | 207.19801   |
| Naltrexone hydrochloride dihydrate     | 207.0683    |
| Praziquantel                           | 206.16995   |
| Tamoxifen citrate                      | 206.1231    |
| Ifenprodil tartrate                    | 204.77345   |
| Cortisone                              | 201.70115   |
| Sulmazole                              | 201.63379   |
| Pirenzepine dihydrochloride            | 201.1469    |
| Trimethobenzamide hydrochloride        | 200.8810573 |
| Irinotecan hydrochloride trihydrate    | 200.614675  |
| Chlorothiazide                         | 199.37365   |
| Dexamethasone acetate                  | 199.3399    |
| Rifaximin                              | 198.0889074 |
| Cyclopenthiiazide                      | 197.0780337 |
| Carbetapentane citrate                 | 196.93243   |

|                                      |             |
|--------------------------------------|-------------|
| Bupivacaine hydrochloride            | 196.30135   |
| Ethisterone                          | 196.20825   |
| Lisinopril                           | 195.74275   |
| Pioglitazone                         | 195.7398    |
| Amodiaquin dihydrochloride dihydrate | 195.46345   |
| Diazoxide                            | 195.1421    |
| Oxybutynin chloride                  | 194.81175   |
| Doxepin hydrochloride                | 194.579     |
| Verapamil hydrochloride              | 194.5722    |
| N-Acetyl-DL-homocysteine Thiolactone | 194.401848  |
| Methenamine                          | 194.2667221 |
| Chlorpheniramine maleate             | 194.044     |
| Demecarium bromide                   | 193.6245025 |
| Flurandrenolide                      | 192.439108  |
| Erythromycin                         | 192.237     |
| Cinnarizine                          | 191.8791    |
| Ciclopirox ethanolamine              | 191.83575   |
| Indomethacin                         | 191.1343    |
| Promethazine hydrochloride           | 190.6536    |
| Pizotifen malate                     | 190.6153317 |
| Fludrocortisone acetate              | 190.52915   |
| Triclosan                            | 190.4445368 |
| Fluvoxamine maleate                  | 189.5152974 |
| Busulfan                             | 188.8593    |
| Chlorprothixene hydrochloride        | 188.59713   |
| Amitriptyline hydrochloride          | 186.1585903 |
| Clozapine                            | 185.43849   |
| Amethopterin (R,S)                   | 185.04366   |
| Zuclopenthixol dihydrochloride       | 184.8401513 |
| Nalbuphine hydrochloride             | 184.1472    |
| Disopyramide                         | 184.10525   |
| Clindamycin hydrochloride            | 184.0499    |
| Prednisolone                         | 183.82595   |
| Antazoline hydrochloride             | 183.63975   |
| Flavoxate hydrochloride              | 183.5932    |
| GBR 12909 dihydrochloride            | 183.24499   |
| Amidopyrine                          | 183.2437    |
| Chlormezanone                        | 183.20112   |
| Desipramine hydrochloride            | 183.20112   |
| Suxibuzone                           | 182.889623  |
| Losartan                             | 182.6339842 |

|                                   |             |
|-----------------------------------|-------------|
| Tripolidine hydrochloride         | 182.3829    |
| Nafronyl oxalate                  | 182.23598   |
| Nefazodone HCl                    | 182.01663   |
| Nomifensine maleate               | 181.8954    |
| Isotretinoin                      | 181.49845   |
| Bicalutamide                      | 181.3872    |
| Terfenadine                       | 180.8946    |
| Trazodone hydrochloride           | 180.66055   |
| Picotamide monohydrate            | 180.6027    |
| Pinacidil                         | 180.5209    |
| Citalopram Hydrobromide           | 180.451296  |
| Ketotifen fumarate                | 180.34957   |
| Famciclovir                       | 179.9750727 |
| Estropipate                       | 178.858457  |
| Mifepristone                      | 178.752     |
| Phentermine hydrochloride         | 178.479435  |
| Telenzepine dihydrochloride       | 178.33305   |
| Meloxicam                         | 178.15607   |
| Ibutilide fumarate                | 178.126204  |
| Telmisartan                       | 177.9808891 |
| Fenofibrate                       | 177.821     |
| Dicloxacillin sodium salt hydrate | 177.8       |
| Dihydrostreptomycin sulfate       | 177.5864    |
| Astemizole                        | 177.5447    |
| Dihydroergotamine tartrate        | 177.3779    |
| Pindolol                          | 177.2528    |
| Carvedilol                        | 176.8176153 |
| Bepidil hydrochloride             | 176.75223   |
| Methacycline hydrochloride        | 176.4523891 |
| Ascorbic acid                     | 175.96257   |
| Neomycin sulfate                  | 175.6126    |
| Trifluridine                      | 175.5922693 |
| Ketoconazole                      | 175.21678   |
| Proadifen hydrochloride           | 174.393     |
| 6-Furfurylaminopurine             | 174.389449  |
| Nocodazole                        | 174.2087    |
| Olmesartan                        | 174.1587038 |
| Enalapril maleate                 | 173.86425   |
| Butylscopolammonium (n-) bromide  | 173.85347   |
| Flunisolide                       | 173.596804  |
| Tramadol hydrochloride            | 173.55151   |

|                                   |             |
|-----------------------------------|-------------|
| Penbutolol sulfate                | 172.8491272 |
| Procainamide hydrochloride        | 172.36523   |
| Acetylsalicylsalicylic acid       | 172.1098    |
| Fluoxetine hydrochloride          | 171.5943    |
| Fleroxacin                        | 170.6688824 |
| Mepivacaine hydrochloride         | 169.8379726 |
| Candesartan                       | 169.8379726 |
| Bifonazole                        | 169.6717906 |
| Etanidazole                       | 169.39956   |
| Nalmefene hydrochloride           | 169.1732447 |
| Pempidine tartrate                | 169.052306  |
| Phenylpropanolamine hydrochloride | 168.50467   |
| Debrisoquin sulfate               | 168.32919   |
| Vecuronium bromide                | 168.0099709 |
| Diphenidol hydrochloride          | 167.99895   |
| Nicorandil                        | 167.2031    |
| Dizocilpine maleate               | 166.9946    |
| Zaprinast                         | 166.57439   |
| Olopatadine hydrochloride         | 166.3481512 |
| Pravastatin                       | 166.3481512 |
| Hexamethonium dibromide dihydrate | 166.3259912 |
| Clobetasol propionate             | 166.2606    |
| Carprofen                         | 166.1819693 |
| Tacrine hydrochloride             | 166.17956   |
| Clarithromycin                    | 165.8496053 |
| Clopamide                         | 165.43377   |
| Nadide                            | 164.9322    |
| Acyclovir                         | 164.3814    |
| Chlorthalidone                    | 164.38089   |
| Floxuridine                       | 164.2145067 |
| Pyrimethamine                     | 164.0440529 |
| Saquinavir mesylate               | 163.8715711 |
| Caffeine                          | 163.8554217 |
| Methapyrilene hydrochloride       | 163.6351    |
| Antipyrine, 4-hydroxy             | 163.6123348 |
| Cisapride                         | 163.5725    |
| Sildenafil                        | 163.5230577 |
| Cladribine                        | 162.8583299 |
| Mepenzolate bromide               | 162.658303  |
| Sulbactam                         | 162.5259659 |
| Lincomycin hydrochloride          | 162.41295   |

|                               |             |
|-------------------------------|-------------|
| Paclitaxel                    | 162.0462    |
| Amoxicillin                   | 161.8803    |
| Chlorpropamide                | 161.79256   |
| Asenapine maleate             | 161.391875  |
| Moclobemide                   | 161.26612   |
| Ritodrine hydrochloride       | 161.17838   |
| Granisetron                   | 161.0303282 |
| Aripiprazole                  | 161.0303282 |
| Vorinostat                    | 160.7543641 |
| Diethylcarbamazine citrate    | 160.6906    |
| Cefmetazole sodium salt       | 160.476642  |
| Pemirolast potassium          | 160.16937   |
| Valacyclovir hydrochloride    | 159.635     |
| Lansoprazole                  | 159.5074813 |
| Mexiletine hydrochloride      | 159.4803    |
| Deptropine citrate            | 159.264352  |
| Nandrolone                    | 159.1268477 |
| Cyclobenzaprine hydrochloride | 158.2       |
| Atorvastatin                  | 158.0390528 |
| Benfotiamine                  | 158.008119  |
| Montelukast                   | 157.8728708 |
| Chlorambucil                  | 157.7618454 |
| Ibandronate sodium            | 157.238121  |
| Picrotoxinin                  | 157.049396  |
| Bezafibrate                   | 157.01073   |
| Tolnaftate                    | 156.9162996 |
| Hexetidine                    | 156.891     |
| Dimenhydrinate                | 156.73385   |
| Venlafaxine                   | 156.71724   |
| Guanabenz acetate             | 156.5418    |
| Benfluorex hydrochloride      | 156.44042   |
| Warfarin                      | 156.302045  |
| Cefotaxime sodium salt        | 156.1943    |
| Practolol                     | 156.04559   |
| Gatifloxacin                  | 156.0448691 |
| Oxethazaine                   | 156.0088106 |
| Betamethasone                 | 155.56302   |
| Methiothepin maleate          | 155.56302   |
| ProbucoI                      | 154.68562   |
| Fluocinolone acetonide        | 154.3830494 |
| Albendazole                   | 154.22015   |

|                                    |             |
|------------------------------------|-------------|
| Ambrisentan                        | 154.2168675 |
| Medrysone                          | 153.4302    |
| Vidarabine                         | 153.0738    |
| Flunarizine dihydrochloride        | 152.91675   |
| Baclofen (R,S)                     | 152.6081    |
| Clenbuterol hydrochloride          | 152.40438   |
| Bisoprolol fumarate                | 152.18503   |
| Racepinephrine HCl                 | 152.0565019 |
| Dropropizine (R,S)                 | 151.89265   |
| Tracazolate hydrochloride          | 151.83912   |
| Risperidone                        | 151.83912   |
| S(-)Eticlopride hydrochloride      | 151.7148    |
| Acetylsalicylic acid               | 151.557956  |
| Imiquimod                          | 151.391774  |
| Acefylline                         | 151.108333  |
| Remoxipride Hydrochloride          | 150.8765899 |
| Homochlorcyclizine dihydrochloride | 150.822     |
| Etoposide                          | 150.78119   |
| Rufloxacin                         | 150.7270461 |
| Enilconazole                       | 150.464077  |
| Brinzolamide                       | 150.38636   |
| Pentamidine isethionate            | 150.381     |
| Methylprednisolone, 6-alpha        | 150.1703    |
| (S)-(-)-Cycloserine                | 150.0311721 |
| Zoxazolamine                       | 149.46509   |
| Carbimazole                        | 149.45      |
| Valproic acid                      | 149.3975904 |
| Bosentan                           | 149.3975904 |
| Cefoperazone dihydrate             | 149.07026   |
| Diclazuril                         | 148.8990445 |
| Methylethergometrine maleate       | 148.06125   |
| Parbendazole                       | 147.9114713 |
| Zonisamide                         | 147.862263  |
| Clavulanate potassium salt         | 147.7357707 |
| Benzathine benzylpenicillin        | 147.7139911 |
| Diperodon hydrochloride            | 147.70315   |
| Guanadrel sulfate                  | 147.42      |
| Ivermectin                         | 147.2844    |
| Alfuzosin hydrochloride            | 147.22772   |
| Metergoline                        | 147.22772   |
| Ondansetron Hydrochloride          | 147.1633416 |

|                                |             |
|--------------------------------|-------------|
| Etilefrine hydrochloride       | 147.0264696 |
| Tremorine dihydrochloride      | 146.9645    |
| Lidoflazine                    | 146.78902   |
| Triflupromazine hydrochloride  | 146.5814978 |
| Domperidone                    | 146.56967   |
| Thioguanosine                  | 146.39419   |
| Sulfisoxazole                  | 146.30645   |
| Progesterone                   | 146.3       |
| Anastrozole                    | 146.2401329 |
| Amcinonide                     | 145.907769  |
| Oxfendazol                     | 145.5139223 |
| Fluorometholone                | 145.454132  |
| Irsogladine maleate            | 145.227662  |
| Sulfamerazine                  | 145.031388  |
| Didanosine                     | 144.9492    |
| Dipyridamole                   | 144.8797    |
| Pramipexole                    | 144.4138879 |
| Famotidine                     | 144.3654    |
| 4-aminosalicylic acid          | 144.1708229 |
| Furosemide                     | 144.15682   |
| Omeprazole                     | 144.03375   |
| Danazol                        | 143.9484    |
| Gemcitabine                    | 143.9135854 |
| Ethacrynic acid                | 143.6533    |
| Thiamine hydrochloride         | 143.468745  |
| Buspirone hydrochloride        | 143.4150395 |
| Aprepitant                     | 143.1756    |
| Terconazole                    | 143.1084    |
| Cephalothin sodium salt        | 143.015805  |
| Acetylcysteine                 | 142.7503116 |
| Clorgyline hydrochloride       | 142.53363   |
| Niclosamide                    | 142.2819383 |
| Clofibrate                     | 142.2517657 |
| Meropenem                      | 142.1758105 |
| Cefsulodin sodium salt         | 141.9552    |
| Levopropoxyphene napsylate     | 141.9264339 |
| Ceforanide                     | 141.855     |
| Tetrahydrozoline hydrochloride | 141.815514  |
| Isradipine                     | 141.8013063 |
| Zardaverine                    | 141.663802  |
| Kanamycin A sulfate            | 141.65623   |



|                               |             |
|-------------------------------|-------------|
| Bambuterol hydrochloride      | 141.56849   |
| Nialamide                     | 141.4276808 |
| Nadifloxacin                  | 141.4276808 |
| Cyclophosphamide              | 141.4208558 |
| Rosiglitazone Hydrochloride   | 140.9223099 |
| Norcyclobenzaprine            | 140.895     |
| Liothyronine                  | 140.8516    |
| Promazine hydrochloride       | 140.78885   |
| Acetopromazine maleate salt   | 140.5715025 |
| Ethamsylate                   | 140.1512547 |
| Ioxaglic acid                 | 139.9314214 |
| Trioxsalen                    | 139.6565    |
| THIP Hydrochloride            | 139.4637332 |
| Butoconazole nitrate          | 139.2475    |
| Clofazimine                   | 139.0679    |
| Milrinone                     | 138.8092269 |
| Benzylpenicillin sodium       | 138.5598504 |
| Gliquidone                    | 138.3636989 |
| Sarafloxacin                  | 138.3104738 |
| Nitrocaramiphen hydrochloride | 138.2261946 |
| Levalbuterol hydrochloride    | 138.0610973 |
| Fluconazole                   | 137.7648525 |
| Nimodipine                    | 137.4032    |
| Mefenamic acid                | 137.2687225 |
| Loratadine                    | 137.08984   |
| Rivastigmine                  | 136.9339427 |
| Sulfacetamide sodic hydrate   | 136.9162996 |
| Moxonidine                    | 136.8511516 |
| Nomegestrol acetate           | 136.8511516 |
| Droperidol                    | 136.61118   |
| Pronethalol hydrochloride     | 136.3011344 |
| Melatonin                     | 136.1325    |
| (S)-propranolol hydrochloride | 136.0660848 |
| Ibudilast                     | 135.9368509 |
| Guaiacol                      | 135.8886215 |
| Mebeverine hydrochloride      | 135.5536    |
| Estradiol Valerate            | 135.4383049 |
| Azapropazone                  | 135.3386043 |
| Oxiconazole Nitrate           | 135.293178  |
| Cefdinir                      | 134.939759  |
| Doxofylline                   | 134.304259  |

|                                         |             |
|-----------------------------------------|-------------|
| Butalbital                              | 134.015     |
| Nilvadipine                             | 133.858868  |
| Flucloxacillin sodium                   | 133.8260571 |
| Sulfadoxine                             | 133.8216958 |
| Tripelennamine hydrochloride            | 133.7764853 |
| Fentiazac                               | 133.5775    |
| Cromolyn disodium salt                  | 133.5604    |
| Novobiocin sodium salt                  | 133.486     |
| Enoxacin                                | 133.4441213 |
| Toltrazuril                             | 133.3229426 |
| Fosinopril                              | 133.2779393 |
| Melengestrol acetate                    | 133.1117574 |
| Pyrilamine maleate                      | 133.0399    |
| Ranolazine                              | 132.8241895 |
| Mebhydroline 1,5-naphthalenedisulfonate | 132.7025    |
| Amiodarone hydrochloride                | 132.3       |
| Mesalamine                              | 132.2007481 |
| Lynestrenol                             | 132.1195    |
| Salmeterol                              | 131.6608    |
| Raclopride                              | 131.635     |
| Canrenone                               | 131.6259883 |
| (R)-Propranolol hydrochloride           | 131.3279302 |
| Minocycline hydrochloride               | 131.31755   |
| Betaxolol hydrochloride                 | 131.30291   |
| Nicardipine hydrochloride               | 131.25904   |
| Corticosterone                          | 130.97      |
| Haloperidol                             | 130.7851    |
| Chlortetracycline hydrochloride         | 130.6183    |
| Alfaxalone                              | 130.5259539 |
| Talampicillin hydrochloride             | 130.5259539 |
| Clodronate                              | 130.484465  |
| Naftifine hydrochloride                 | 130.4551122 |
| Gestrinone                              | 130.3884496 |
| Etidronic acid, disodium salt           | 130.262     |
| Diflunisal                              | 130.1938326 |
| Moxifloxacin                            | 129.9543    |
| Tranilast                               | 129.9471225 |
| Apramycin                               | 129.8384325 |
| Arbutin                                 | 129.8384325 |
| Bromhexine hydrochloride                | 129.621936  |
| Lamotrigine                             | 129.4557541 |

|                            |             |
|----------------------------|-------------|
| Homosalate                 | 129.3329177 |
| Pilocarpine nitrate        | 129.15      |
| Ronidazole                 | 129.0835411 |
| Etomidate                  | 128.9588529 |
| Anethole-trithione         | 128.7910262 |
| Bufexamac                  | 128.7573    |
| Ribavirin                  | 128.7383981 |
| Clonixin Lysinate          | 128.7094763 |
| Niacin                     | 128.686     |
| Tribenoside                | 128.6008938 |
| Benztropine mesylate       | 128.4586622 |
| Mevastatin                 | 128.2039525 |
| Oxibendazol                | 128.1901725 |
| Letrozole                  | 128.1883809 |
| Ethinylestradiol           | 128.1262983 |
| Ciprofibrate               | 127.9613466 |
| Probenecid                 | 127.9401    |
| Naftopidil dihydrochloride | 127.9133723 |
| Propoxycaine hydrochloride | 127.8366584 |
| Podophyllotoxin            | 127.818     |
| Dyclonine hydrochloride    | 127.59355   |
| Roxatidine Acetate HCl     | 127.365     |
| Alprostadil                | 127.3633551 |
| Mitotane                   | 127.2953885 |
| Meprylcaine hydrochloride  | 127.213217  |
| Tulobuterol                | 127.1292065 |
| Spironolactone             | 126.7958    |
| Succinylsulfathiazole      | 126.679769  |
| Oxacillin sodium           | 126.506142  |
| Acebutolol hydrochloride   | 126.4052863 |
| Oxaprozin                  | 126.340399  |
| Prothionamide              | 126.1258164 |
| Flumethasone               | 126.0684    |
| Sotalol hydrochloride      | 125.8508078 |
| Balsalazide Sodium         | 125.5824    |
| Trapidil                   | 125.5757992 |
| Terbutaline hemisulfate    | 125.4682    |
| Prednicarbate              | 125.467581  |
| Tetracycline hydrochloride | 125.3502    |
| Nifurtimox                 | 125.3007906 |
| Piperidolate hydrochloride | 125.2182045 |

|                                         |             |
|-----------------------------------------|-------------|
| Docetaxel                               | 124.9688409 |
| Estriol                                 | 124.9688279 |
| Itopride                                | 124.6875    |
| Benzbromarone                           | 124.54693   |
| Iopanoic acid                           | 124.3453865 |
| Imidurea                                | 124.3453865 |
| Ramipril                                | 124.2206983 |
| Furaltadone hydrochloride               | 123.9948    |
| Alverine citrate salt                   | 123.861275  |
| 3-alpha-Hydroxy-5-beta-androstan-17-one | 123.826247  |
| Protriptyline hydrochloride             | 123.7724    |
| Cyclopentolate hydrochloride            | 123.7219451 |
| Sertraline                              | 123.2382262 |
| Procarbazine hydrochloride              | 122.7244389 |
| Fursultiamine Hydrochloride             | 122.688209  |
| Oxytetracycline dihydrate               | 122.6127    |
| Hydroxytacrine maleate (R,S)            | 122.5525    |
| Ketanserin tartrate hydrate             | 122.44117   |
| Piperacetazine                          | 122.3503741 |
| Bethanechol chloride                    | 122.3503741 |
| Topiramate                              | 122.3503741 |
| Bupropion hydrochloride                 | 122.19375   |
| Denatonium benzoate                     | 122.1381918 |
| Dimaprit dihydrochloride                | 122.1381918 |
| Piperacillin sodium salt                | 122.0346    |
| D-cycloserine                           | 121.8516209 |
| Alfadolone acetate                      | 121.313166  |
| Sulfinpyrazone                          | 121.3093    |
| Guanethidine sulfate                    | 121.16965   |
| Beta-Escin                              | 121.153901  |
| Cortisol acetate                        | 121.138     |
| Amifostine                              | 121.1175    |
| Pivampicillin                           | 120.9006531 |
| Azaperone                               | 120.8541147 |
| Nilutamide                              | 120.5756    |
| Clebopride maleate                      | 120.46702   |
| Memantine Hydrochloride                 | 120.350636  |
| Zalcitabine                             | 120.350636  |
| Penicillamine                           | 120.323511  |
| Nitrofurantoin                          | 120.254475  |
| Streptomycin sulfate                    | 120.15993   |

|                                                                           |             |
|---------------------------------------------------------------------------|-------------|
| Tiabendazole                                                              | 120.0723    |
| Oxyphenbutazone                                                           | 119.8566085 |
| Spaglumic acid                                                            | 119.8566085 |
| Mesna                                                                     | 119.8171998 |
| Tazobactam                                                                | 119.50067   |
| Pivmecillinam hydrochloride                                               | 119.3578554 |
| Minoxidil                                                                 | 119.339207  |
| Phenylbutazone                                                            | 119.2506016 |
| Fexofenadine HCl                                                          | 119.1084788 |
| Pirenperone                                                               | 118.947     |
| Nortriptyline hydrochloride                                               | 118.84215   |
| Clofibric acid                                                            | 118.7946    |
| Diphepanil methylsulfate                                                  | 118.7753304 |
| Dorzolamide hydrochloride                                                 | 118.6097257 |
| Pipenzolate bromide                                                       | 118.1628    |
| Halofantrine hydrochloride                                                | 118.1505672 |
| Fluocinonide                                                              | 118.0818    |
| Althiazide                                                                | 117.774     |
| Ethopropazine hydrochloride                                               | 117.7008    |
| Pepstatin A                                                               | 117.3375    |
| Moricizine hydrochloride                                                  | 117.1134663 |
| Imatinib                                                                  | 116.9921064 |
| Clocortolone pivalate                                                     | 116.9887781 |
| Finasteride                                                               | 116.971755  |
| Adrenosterone                                                             | 116.8608    |
| Tosufloxacin hydrochloride                                                | 116.655     |
| Metaproterenol sulfate, orciprenaline sulfate                             | 116.65455   |
| Flunixin meglumine                                                        | 116.559     |
| Neostigmine bromide                                                       | 116.5325    |
| Morpholinoethylamino-3-benzocyclohepta-(5,6-c)-pyridazine dihydrochloride | 116.41      |
| Drofenine hydrochloride                                                   | 116.3322    |
| Norgestimate                                                              | 116.225507  |
| Rabeprazole Sodium salt                                                   | 116.1756    |
| Guaifenesin                                                               | 116.1378    |
| Dehydrocholic acid                                                        | 115.9538    |
| Chloropyramine hydrochloride                                              | 115.8904    |
| Rebamipide                                                                | 115.665778  |
| Dextromethorphan hydrobromide monohydrate                                 | 115.55358   |
| Metrizamide                                                               | 115.5525    |
| Norgestrel-(-)-D                                                          | 115.425     |
| Anthralin                                                                 | 115.3302867 |

|                                            |             |
|--------------------------------------------|-------------|
| Alcuronium chloride                        | 115.262977  |
| Buflomedil hydrochloride                   | 115.1325    |
| Streptozotocin                             | 114.7284    |
| Lofexidine                                 | 114.669     |
| Sulfamethizole                             | 114.6312    |
| Tridihexethyl chloride                     | 114.6197007 |
| Hycanthone                                 | 114.28135   |
| Epiandrosterone                            | 114.205     |
| Carbadox                                   | 114.0312225 |
| (-)-Isoproterenol hydrochloride            | 113.9962594 |
| Benzamil hydrochloride                     | 113.967253  |
| Ozagrel hydrochloride                      | 113.887934  |
| Hydrocortisone base                        | 113.8375    |
| (+,-)-Synephrine                           | 113.6221945 |
| Bendroflumethiazide                        | 113.5296    |
| Methantheline bromide                      | 113.1234414 |
| Methiazole                                 | 113.1234414 |
| Clioquinol                                 | 112.6428    |
| Rofecoxib                                  | 112.59975   |
| Tiletamine hydrochloride                   | 112.512891  |
| Rifampicin                                 | 112.3161    |
| Meclofenoxate hydrochloride                | 112.1364    |
| Tocainide hydrochloride                    | 111.9628738 |
| Cefadroxil                                 | 111.9125    |
| Sulfadimethoxine                           | 111.8448    |
| Vatalanib                                  | 111.6325    |
| 2-Chloropyrazine                           | 111.627182  |
| Cefotetan                                  | 111.5625    |
| Methacholine chloride                      | 111.456     |
| Antipyrine                                 | 111.4449339 |
| Metoprolol-(+,-) (+)-tartrate salt         | 111.375     |
| Sulfaquinoxaline sodium salt               | 111.0672    |
| Colchicine                                 | 110.90336   |
| Nadolol                                    | 110.6948    |
| Formoterol fumarate                        | 110.6771915 |
| Tiratricol, 3,3',5-triiodothyroacetic acid | 110.243475  |
| Tylosin                                    | 110.147459  |
| Minaprine dihydrochloride                  | 110.1409692 |
| Cefuroxime sodium salt                     | 110.026675  |
| Quetiapine hemifumarate                    | 109.83      |
| Megestrol acetate                          | 109.6532    |

|                                                                        |             |
|------------------------------------------------------------------------|-------------|
| Zimelidine dihydrochloride monohydrate                                 | 109.6432    |
| Fipexide hydrochloride                                                 | 109.62525   |
| Isoetharine mesylate salt                                              | 109.593     |
| Norethynodrel                                                          | 109.5154185 |
| Betahistine mesylate                                                   | 109.461     |
| Sparfloxacin                                                           | 109.3477358 |
| Dicumarol                                                              | 109.3014    |
| Zileuton                                                               | 109.166089  |
| Isopyrin hydrochloride                                                 | 109.0584    |
| Molindone hydrochloride                                                | 108.3877621 |
| Isoquinoline, 6,7-dimethoxy-1-methyl-1,2,3,4-tetrahydro, hydrochloride | 108.2892    |
| Closantel                                                              | 108.15      |
| Phenethicillin potassium salt                                          | 108.135     |
| Dicyclomine hydrochloride                                              | 108.0881057 |
| Flecainide acetate                                                     | 108.0702    |
| Clinafloxacin                                                          | 108.0412    |
| Bacampicillin hydrochloride                                            | 107.9225    |
| Amikacin hydrate                                                       | 107.9202    |
| Deferoxamine mesylate                                                  | 107.7786    |
| Cefepime hydrochloride                                                 | 107.7618454 |
| Hesperidin                                                             | 107.70085   |
| Liranaftate                                                            | 107.6976    |
| Piretanide                                                             | 107.5124688 |
| Deoxycorticosterone                                                    | 107.3148    |
| Gabexate mesilate                                                      | 107.2877277 |
| Pentetic acid                                                          | 107.2408    |
| Fusidic acid sodium salt                                               | 107.17441   |
| Quinethazone                                                           | 107.138404  |
| Rimantadine Hydrochloride                                              | 106.8587325 |
| Sertaconazole nitrate                                                  | 106.7643392 |
| Phensuximide                                                           | 106.5149626 |
| Modafinil                                                              | 106.4875    |
| Misoprostol                                                            | 106.3902743 |
| Sulfanilamide                                                          | 106.3854    |
| Azlocillin sodium salt                                                 | 106.3176    |
| Piribedil hydrochloride                                                | 105.9126848 |
| Nalidixic acid sodium salt                                             | 105.859627  |
| Isoxsuprine hydrochloride                                              | 105.7004405 |
| Sulconazole nitrate                                                    | 105.6604    |
| Fluvastatin sodium salt                                                | 105.6604    |
| Azithromycin                                                           | 105.5255505 |

|                                      |             |
|--------------------------------------|-------------|
| Ticarcillin sodium                   | 105.5174564 |
| Ethionamide                          | 105.49455   |
| Pancuronium bromide                  | 105.3626676 |
| Carisoprodol                         | 105.315     |
| Sulfaguanidine                       | 105.2246696 |
| Fludarabine                          | 105.1931865 |
| Tolmetin sodium salt dihydrate       | 104.9908    |
| Biotin                               | 104.755     |
| Iocetamic acid                       | 104.4204    |
| Azacytidine-5                        | 104.2716    |
| Leflunomide                          | 104.2146    |
| Perindopril                          | 104.021197  |
| Mevalonic-D, L acid lactone          | 103.9068    |
| Meclozine dihydrochloride            | 103.88      |
| Isometheptene mucate                 | 103.8501203 |
| Folinic acid calcium salt            | 103.8258    |
| Hexylcaine hydrochloride             | 103.7448    |
| Simvastatin                          | 103.6764    |
| Nitrendipine                         | 103.5112    |
| Monensin sodium salt                 | 103.437     |
| Sumatriptan succinate                | 103.300516  |
| Sulfamethoxypyridazine               | 102.9186    |
| Ethambutol dihydrochloride           | 102.7577093 |
| Metyrapone                           | 102.6972    |
| Gabazine bromide                     | 102.655     |
| Fenoprofen calcium salt dihydrate    | 102.465     |
| Isosorbide mononitrate               | 102.4002494 |
| Methyldopate hydrochloride           | 102.337573  |
| Mephentermine hemisulfate            | 102.0276    |
| Tetracaine hydrochloride             | 101.9737225 |
| Rolipram                             | 101.898     |
| Isocarboxazid                        | 101.8818    |
| Nizatidine                           | 101.8536    |
| Dehydroisoandosterone 3-acetate      | 101.824     |
| Clonidine hydrochloride              | 101.80485   |
| Dichlorphenamide                     | 101.7172    |
| Quinacrine dihydrochloride dihydrate | 101.71175   |
| Lamivudine                           | 101.71      |
| Rimexolone                           | 101.5125473 |
| Pentobarbital                        | 101.3191725 |
| Mephenytoin                          | 101.2780549 |



|                                |             |
|--------------------------------|-------------|
| Sulfamethazine sodium salt     | 101.25      |
| Torsemide                      | 101.2375387 |
| Crotamiton                     | 101.2172    |
| Clidinium bromide              | 100.9608    |
| Bromopride                     | 100.907483  |
| Indoprofen                     | 100.8616    |
| Azathioprine                   | 100.8306    |
| Cetirizine dihydrochloride     | 100.79805   |
| Opipramol dihydrochloride      | 100.764052  |
| Tizanidine HCl                 | 100.6715125 |
| Propylthiouracil               | 100.59345   |
| Methylhydantoin-5-(D)          | 100.5888    |
| Miglitol                       | 100.57485   |
| Tioconazole                    | 100.5248    |
| Halcinonide                    | 100.492288  |
| Acitretin                      | 100.446994  |
| Acarbose                       | 100.2374425 |
| Thyroxine (L)                  | 100.065     |
| Benzthiazide                   | 100.0432    |
| Dimethadione                   | 99.9068     |
| Hymecromone                    | 99.9        |
| Ethaverine hydrochloride       | 99.882      |
| Meptazinol hydrochloride       | 99.8624957  |
| Brompheniramine maleate        | 99.855      |
| Diphenylpyraline hydrochloride | 99.458075   |
| Dipyrone                       | 99.450526   |
| Alclometasone dipropionate     | 99.387      |
| Theophylline monohydrate       | 99.2496     |
| Methazolamide                  | 99.2372     |
| Famprofazone                   | 99.186311   |
| Phenacetin                     | 99.11475    |
| Dopamine hydrochloride         | 99.04445368 |
| Triamterene                    | 98.91629956 |
| (-)-Emtricitabine              | 98.9145625  |
| Carbidopa                      | 98.7767625  |
| (R) -Naproxen sodium salt      | 98.739      |
| Carbenoxolone disodium salt    | 98.704      |
| Quinapril HCl                  | 98.6864     |
| Acipimox                       | 98.5011625  |
| Methyldopa (L,-)               | 98.44428    |
| Mometasone furoate             | 98.3289125  |

|                                |             |
|--------------------------------|-------------|
| Phthalylsulfathiazole          | 98.2328     |
| Tinidazole                     | 98.0424     |
| Ziprasidone Hydrochloride      | 97.7846025  |
| Sulfapyridine                  | 97.6536     |
| Dolasetron mesilate            | 97.5764     |
| Cefaclor hydrate               | 97.5663     |
| Nifuroxazide                   | 97.5663     |
| Abacavir Sulfate               | 97.5616     |
| Diltiazem hydrochloride        | 97.5363     |
| Gefitinib                      | 97.502884   |
| Oxymetazoline hydrochloride    | 97.477675   |
| Meglumine                      | 97.458      |
| Dacarbazine                    | 97.4401025  |
| Cinoxacin                      | 97.3782     |
| Glipizide                      | 97.2861     |
| Metixene hydrochloride         | 97.2594     |
| Clobutinol hydrochloride       | 97.23       |
| Dibenzepine hydrochloride      | 97.02       |
| Ornidazole                     | 97.001975   |
| Theobromine                    | 96.9556     |
| Ethotoin                       | 96.92916    |
| Amfepramone hydrochloride      | 96.9108     |
| Lithocholic acid               | 96.9084     |
| Atractyloside potassium salt   | 96.8274     |
| Clomiphene citrate (Z,E)       | 96.38239    |
| Butenafine Hydrochloride       | 96.2550225  |
| Homatropine hydrobromide (R,S) | 96.12334802 |
| Propofol                       | 96.0964     |
| Pyridostigmine iodide          | 96.0069825  |
| Levocabastine hydrochloride    | 95.87487109 |
| Pralidoxime chloride           | 95.8744     |
| Glycopyrrolate                 | 95.823      |
| Urapidil hydrochloride         | 95.6968     |
| Atropine sulfate monohydrate   | 95.5040125  |
| (-) -Levobunolol hydrochloride | 95.356      |
| Ioversol                       | 95.2816     |
| Butacaine                      | 95.2692     |
| Benoxinate hydrochloride       | 95.24229075 |
| Felodipine                     | 95.2175     |
| Cytarabine                     | 95.1457325  |
| Formestane                     | 95.0436409  |

|                            |             |
|----------------------------|-------------|
| Sulfameter                 | 94.9968     |
| Dioxybenzone               | 94.8236     |
| Hydralazine hydrochloride  | 94.566675   |
| Decamethonium bromide      | 94.49982812 |
| Phentolamine hydrochloride | 94.445975   |
| Entacapone                 | 94.4291725  |
| Viloxazine hydrochloride   | 94.4012     |
| Oxantel pamoate            | 94.3205     |
| Oxprenolol hydrochloride   | 94.29551122 |
| Cloxacillin sodium salt    | 94.197475   |
| Bemegride                  | 94.1724     |
| Isoxicam                   | 94.06167401 |
| Estrone                    | 93.9208     |
| Haloprogin                 | 93.66       |
| Alendronate sodium         | 93.6230425  |
| Piroxicam                  | 93.586875   |
| Chlorotrianisene           | 93.474      |
| Ribostamycin sulfate salt  | 93.4254     |
| Gabapentin                 | 93.31       |
| S-(+)-ibuprofen            | 93.2696     |
| Tobramycin                 | 93.24645    |
| Viomycin sulfate           | 93.17331671 |
| Procyclidine hydrochloride | 93.1612     |
| Eucatropine hydrochloride  | 93.0366     |
| Fosfosal                   | 92.6528     |
| Pentoxifylline             | 92.415375   |
| Hemicholinium bromide      | 92.21474    |
| Levonordefrin              | 92.178      |
| Benzocaine                 | 92.112898   |
| Acetaminophen              | 91.9584     |
| Primidone                  | 91.9524     |
| Methimazole                | 91.7568     |
| Epitiostanol               | 91.61223788 |
| Articaine hydrochloride    | 91.47473359 |
| Diloxanide furoate         | 91.4344     |
| Pyrazinamide               | 91.43295    |
| Mafenide hydrochloride     | 91.378775   |
| Loracarbef                 | 91.3217825  |
| 2-Aminobenzenesulfonamide  | 91.2864     |
| Propantheline bromide      | 91.2144     |
| Zomepirac sodium salt      | 91.1412     |

|                                   |             |
|-----------------------------------|-------------|
| Adamantamine fumarate             | 91.0525     |
| Aminohippuric acid                | 91.0348     |
| Carbinoxamine maleate salt        | 90.9788     |
| Prazosin hydrochloride            | 90.9756     |
| Naphazoline hydrochloride         | 90.86343612 |
| Iodixanol                         | 90.8548     |
| Estradiol-17 beta                 | 90.755      |
| Bretylum tosylate                 | 90.28       |
| Alizapride HCl                    | 90.125      |
| (-)-MK 801 hydrogen maleate       | 90.0876     |
| Troglitazone                      | 89.9300025  |
| Iopamidol                         | 89.8752     |
| Amphotericin B                    | 89.7225     |
| Tibolone                          | 89.674775   |
| (+) -Levobunolol hydrochloride    | 89.652      |
| Zafirlukast                       | 89.4890425  |
| Repaglinide                       | 89.43266833 |
| Dinoprost trometamol              | 89.3375     |
| Nylidrin                          | 89.3172     |
| Isopropamide iodide               | 89.3106     |
| Piromidic acid                    | 89.28       |
| Metaraminol bitartrate            | 89.234575   |
| Benperidol                        | 89.1963     |
| Diosmin                           | 88.8827225  |
| Flucytosine                       | 88.8148     |
| Flurbiprofen                      | 88.7112     |
| Thioperamide maleate              | 88.6816     |
| Cefoxitin sodium salt             | 88.6476     |
| Clemizole hydrochloride           | 88.538775   |
| Quipazine dimaleate salt          | 88.5313325  |
| Deflazacort                       | 88.4864     |
| Diprophylline                     | 88.45814978 |
| Aminopurine, 6-benzyl             | 88.382575   |
| Bacitracin                        | 88.1932     |
| Tranylcypromine hydrochloride     | 88.134075   |
| Ganciclovir                       | 87.9284     |
| Iproniazide phosphate             | 87.771975   |
| Iopromide                         | 87.7672     |
| Mecamylamine hydrochloride        | 87.56234414 |
| Nafcillin sodium salt monohydrate | 87.3952     |
| Iodipamide                        | 87.3792     |

|                                         |             |
|-----------------------------------------|-------------|
| Ethosuximide                            | 87.274975   |
| Ciprofloxacin hydrochloride monohydrate | 87.2364     |
| Ampyrone                                | 87.218175   |
| Nifedipine                              | 87.15418502 |
| Paromomycin sulfate                     | 87.0108     |
| Captopril                               | 86.99559471 |
| Tenatoprazole                           | 86.9397425  |
| Oxalamine citrate salt                  | 86.8868     |
| Moxalactam disodium salt                | 86.6264     |
| Ranitidine hydrochloride                | 86.273875   |
| Levamisole hydrochloride                | 86.231275   |
| N-Acetyl-L-leucine                      | 86.2248     |
| Lacidipine                              | 86.1129425  |
| Cefazolin sodium salt                   | 86.0706     |
| Pheniramine maleate                     | 86.05286344 |
| Imipramine hydrochloride                | 86.05286344 |
| Azacyclonol                             | 85.8464     |
| Furazolidone                            | 85.7212     |
| Tetramisole hydrochloride               | 85.71345    |
| Trihexyphenidyl-D,L Hydrochloride       | 85.666052   |
| Benzonatate                             | 85.65638767 |
| Hydrochlorothiazide                     | 85.6123348  |
| Tetrahydroxy-1,4-quinone monohydrate    | 85.5352     |
| Fenipentol                              | 85.3068125  |
| Felbinac                                | 85.174      |
| Cilostazol                              | 85.1070025  |
| Nimesulide                              | 84.910675   |
| Tranexamic acid                         | 84.853875   |
| Selegiline hydrochloride                | 84.8439     |
| (R)-(+)-Atenolol                        | 84.6116     |
| Tomoxetine hydrochloride                | 84.5489125  |
| Dobutamine hydrochloride                | 84.36201    |
| Lorglumide sodium salt                  | 84.3156     |
| Betazole hydrochloride                  | 84.24669604 |
| Nisoldipine                             | 84.058115   |
| Ampicillin trihydrate                   | 83.9977     |
| Altretamine                             | 83.9308     |
| Metolazone                              | 83.8865     |
| Dapsone                                 | 83.77092511 |
| Ethoxyquin                              | 83.7378     |
| Oxcarbazepine                           | 83.7025     |

|                                       |             |
|---------------------------------------|-------------|
| Terazosin hydrochloride               | 83.6406     |
| Ropinirole HCl                        | 83.5980925  |
| Carbarsone                            | 83.5275     |
| Doxycycline hydrochloride             | 83.42334857 |
| Salbutamol                            | 83.398375   |
| Etifenin                              | 83.39775    |
| Butamben                              | 83.2842     |
| Flutamide                             | 83.256375   |
| Troleandomycin                        | 83.24229075 |
| Pipemidic acid                        | 83.2204     |
| Scopolamine hydrochloride             | 83.1048     |
| Methocarbamol                         | 82.645775   |
| Cephalosporanic acid, 7-amino         | 82.5475     |
| Beclomethasone dipropionate           | 82.5468     |
| Hydroflumethiazide                    | 82.42290749 |
| Pranlukast                            | 82.352041   |
| Orphenadrine hydrochloride            | 82.162975   |
| Prilocaine hydrochloride              | 81.957075   |
| (+)-Isoproterenol (+)-bitartrate salt | 81.9328     |
| Norfloxacin                           | 81.893175   |
| Suloctidil                            | 81.795      |
| Fluticasone propionate                | 81.7119285  |
| Metronidazole                         | 81.6903     |
| Proglumide                            | 81.580775   |
| Temozolomide                          | 81.5793225  |
| Amrinone                              | 81.5508     |
| Miconazole                            | 81.46255507 |
| Sulfaphenazole                        | 81.43612335 |
| Spectinomycin dihydrochloride         | 81.4184     |
| Phenformin hydrochloride              | 81.417475   |
| Suprofen                              | 81.406      |
| Methylatropine nitrate                | 81.252      |
| Isoniazid                             | 81.197375   |
| Trichlormethiazide                    | 81.034      |
| Amyleine hydrochloride                | 80.9339207  |
| Hydroxyzine dihydrochloride           | 80.7729     |
| Stavudine                             | 80.7192     |
| Levetiracetam                         | 80.7180725  |
| Xylazine                              | 80.6491725  |
| Mizolastine                           | 80.4975925  |
| Butylparaben                          | 80.2308     |

|                                |             |
|--------------------------------|-------------|
| Lidocaine hydrochloride        | 79.93832599 |
| Midodrine hydrochloride        | 79.685075   |
| Mebendazole                    | 79.521775   |
| Idoxuridine                    | 79.49779736 |
| Amoxapine                      | 79.2022     |
| Fadrozole hydrochloride        | 79.131275   |
| Stanozolol                     | 79.0125     |
| Sulfachloropyridazine          | 78.924795   |
| Heptaminol hydrochloride       | 78.8722467  |
| Phenazopyridine hydrochloride  | 78.7644     |
| Dimethisoquin hydrochloride    | 78.7475325  |
| Aceclofenac                    | 78.712375   |
| Chlorzoxazone                  | 78.648475   |
| Nifenazone                     | 78.627175   |
| Etofylline                     | 78.577475   |
| Amlodipine                     | 78.575      |
| Gemfibrozil                    | 78.250875   |
| Aztreonam                      | 78.201175   |
| Dipivefrin hydrochloride       | 78.1825525  |
| Timolol maleate salt           | 78.1588     |
| Tropicamide                    | 78.009475   |
| Pentolinium bitartrate         | 77.768075   |
| Flumequine                     | 77.704175   |
| Adiphenine hydrochloride       | 77.56828194 |
| Oxolinic acid                  | 77.469875   |
| Ketorolac tromethamine         | 77.4632     |
| Nisoxetine hydrochloride       | 77.4336     |
| Chlorcyclizine hydrochloride   | 77.362152   |
| Methylhydantoin-5-(L)          | 77.3512     |
| Roxithromycin                  | 77.3016     |
| Maprotiline hydrochloride      | 77.25507    |
| Ofloxacin                      | 77.221375   |
| Niridazole                     | 77.0525     |
| Prednisone                     | 76.96035242 |
| (+,-)-Octopamine hydrochloride | 76.8416     |
| Amiprilose hydrochloride       | 76.7064     |
| Mercaptopurine                 | 76.6254125  |
| Mirtazapine                    | 76.59945    |
| Metformin hydrochloride        | 76.52863436 |
| Phenelzine sulfate             | 76.419075   |
| Tiaprider hydrochloride        | 76.312575   |

|                              |             |
|------------------------------|-------------|
| Olanzapine                   | 76.2972     |
| Pargyline hydrochloride      | 76.120875   |
| Atovaquone                   | 75.81825    |
| Pimozide                     | 75.6903     |
| Thiorphan                    | 75.5092325  |
| Yohimbine hydrochloride      | 75.3576525  |
| Xylometazoline hydrochloride | 75.325675   |
| Thalidomide                  | 75.162375   |
| Monobenzene                  | 75.1396     |
| Idazoxan hydrochloride       | 75.0804     |
| Nabumetone                   | 75.0656     |
| Ketoprofen                   | 74.999075   |
| Toremifene                   | 74.9916     |
| Pregnenolone                 | 74.9115     |
| Pefloxacin                   | 74.3925     |
| Diacerein                    | 74.37       |
| Tolazoline hydrochloride     | 74.2907489  |
| Oxybenzone                   | 74.1036     |
| Cefixime                     | 74.0425     |
| Sulfadiazine                 | 73.73568282 |
| Erlotinib                    | 73.6225     |
| Lymecycline                  | 73.59917497 |
| Tolfenamic acid              | 73.380275   |
| Spiramycin                   | 73.3698     |
| Fomepizole                   | 73.3044325  |
| Hydroxychloroquine sulfate   | 73.1804125  |
| Acamprosate calcium          | 73.0081625  |
| Ipsapirone                   | 72.9117025  |
| Doxazosin mesylate           | 72.8872     |
| Nefopam hydrochloride        | 72.883275   |
| Benazepril HCl               | 72.5947625  |
| Zaleplon                     | 72.4500725  |
| Idebenone                    | 72.415      |
| Hexestrol                    | 72.410008   |
| Pyrantel tartrate            | 72.336575   |
| Dydrogesterone               | 72.296773   |
| Pentylentetrazole            | 72.102275   |
| Aceclidine Hydrochloride     | 72.0228925  |
| Doxylamine succinate         | 71.92951542 |
| Chlorpheniramine carbamate   | 71.782775   |
| Lomefloxacin hydrochloride   | 71.569775   |



|                                           |             |
|-------------------------------------------|-------------|
| Sulfamethoxazole                          | 71.534275   |
| Dexfenfluramine hydrochloride             | 71.5130325  |
| Flubendazol                               | 71.4248     |
| Josamycin                                 | 71.3626     |
| Equilin                                   | 71.3248     |
| Etofenamate                               | 71.2305425  |
| Aminophylline                             | 71.1388     |
| Exemestane                                | 71.0720725  |
| Penciclovir                               | 70.9962825  |
| Pramoxine hydrochloride                   | 70.968149   |
| Metoclopramide monohydrochloride          | 70.959175   |
| Carbachol                                 | 70.928      |
| Mephenesin                                | 70.795875   |
| Catharanthine                             | 70.696475   |
| Scopolamin-N-oxide hydrobromide           | 70.476375   |
| Morantel tartrate                         | 70.36123348 |
| Sulindac                                  | 70.36123348 |
| Mefexamide hydrochloride                  | 70.078775   |
| Testosterone propionate                   | 69.72       |
| Emedastine                                | 69.3840225  |
| Phenoxybenzamine hydrochloride            | 69.19       |
| Thiamphenicol                             | 69.13656388 |
| Rifabutin                                 | 68.98379052 |
| Argatroban                                | 68.7570325  |
| Meclofenamic acid sodium salt monohydrate | 68.623275   |
| Linezolid                                 | 68.6        |
| Galanthamine hydrobromide                 | 68.4883225  |
| Griseofulvin                              | 68.424475   |
| L(-)-vesamicol hydrochloride              | 68.3908     |
| Tropisetron HCl                           | 68.39       |
| Indapamide                                | 68.381875   |
| Naloxone hydrochloride                    | 68.2351     |
| Demeclocycline hydrochloride              | 68.121      |
| Fenbufen                                  | 68.076575   |
| Trimethadione                             | 67.90395    |
| Bephenium hydroxynaphthoate               | 67.8876     |
| Ebselen                                   | 67.3758     |
| Etodolac                                  | 67.196175   |
| Diclofenac sodium                         | 66.9656325  |
| Urosiol                                   | 66.9404     |
| Hyoscyamine (L)                           | 66.862475   |

|                                |             |
|--------------------------------|-------------|
| Camylofine chlorhydrate        | 66.8485025  |
| Eburnamonine (-)               | 66.8416125  |
| Carbamazepine                  | 66.81938326 |
| Antimycin A                    | 66.784375   |
| Riluzole hydrochloride         | 66.656575   |
| Papaverine hydrochloride       | 66.5729025  |
| (-)-Eseroline fumarate salt    | 66.49002494 |
| Procaine hydrochloride         | 66.37004405 |
| Trichlorfon                    | 66.21145374 |
| Clomipramine hydrochloride     | 65.4493     |
| Spiperone                      | 65.3562     |
| Dibucaine                      | 65.15418502 |
| Reboxetine mesylate            | 64.9537525  |
| Itraconazole                   | 64.9261925  |
| Propafenone hydrochloride      | 64.5885     |
| Edrophonium chloride           | 64.5516     |
| Ticlopidine hydrochloride      | 64.32599119 |
| Tolbutamide                    | 64.235475   |
| Esmolol hydrochloride          | 63.7288     |
| Fluspirilen                    | 63.1368     |
| Folic acid                     | 63.0245525  |
| Sertindole                     | 62.5009125  |
| Amprolium hydrochloride        | 62.20264317 |
| Tolazamide                     | 62.1426     |
| Pridinol methanesulfonate salt | 62.0622     |
| Voriconazole                   | 61.3847325  |
| Fenbendazole                   | 61.274775   |
| Trimethoprim                   | 61.267675   |
| Levodopa                       | 61.00440529 |
| Darifenacin hydrobromide       | 60.94877965 |
| Flufenamic acid                | 60.387275   |
| Reserpine                      | 60.2764     |
| Carteolol hydrochloride        | 60.1125     |
| Acetohexamide                  | 59.77092511 |
| Khellin                        | 59.7561     |
| Proscillaridin A               | 59.71124098 |
| Fulvestrant                    | 59.7005     |
| Escitalopram                   | 59.3315125  |
| Allopurinol                    | 58.9632     |
| Ethynodiol diacetate           | 58.4304     |
| Iohexol                        | 58.1343     |

|                                   |             |
|-----------------------------------|-------------|
| Meticrane                         | 58.00881057 |
| Todralazine hydrochloride         | 57.55066079 |
| Pinaverium bromide                | 57.266714   |
| Digoxin                           | 56.98       |
| Azelastine HCl                    | 56.8442225  |
| Hexachlorophene                   | 56.66805152 |
| Fenspiride hydrochloride          | 56.468075   |
| Racecadotril                      | 56.2516825  |
| Nitrofuraf                        | 55.22805    |
| Vigabatrin                        | 54.6282     |
| Digitoxigenin                     | 54.11       |
| Proparacaine hydrochloride        | 53.6648     |
| Pyridoxine hydrochloride          | 53.4819025  |
| Dienestrol                        | 53.3628     |
| Acetazolamide                     | 52.73127753 |
| Chlorpromazine hydrochloride      | 52.55506608 |
| Isosorbide dinitrate              | 52.450452   |
| Sulpiride                         | 52.35242291 |
| Luteolin                          | 51.8444     |
| Amiloride hydrochloride dihydrate | 51.55066079 |
| Dequalinium dichloride            | 51.3279     |
| Methoxamine hydrochloride         | 50.97795    |
| Tyloxapol                         | 50.69       |
| Thimerosal                        | 50.616045   |
| Florfenicol                       | 50.5272     |
| Raloxifene hydrochloride          | 50.344      |
| Chloramphenicol                   | 49.9030837  |
| Camptothecin (S,+)                | 48.785875   |
| Naproxen                          | 48.44052863 |
| Biperiden hydrochloride           | 48.2019     |
| Androsterone                      | 48.16       |
| Cimetidine                        | 47.91189427 |
| Amisulpride                       | 47.6460725  |
| Aminocaproic acid                 | 47.508      |
| Moxisylyte hydrochloride          | 47.34801762 |
| Azaguanine-8                      | 47.13656388 |
| Calcipotriene                     | 47.0225     |
| Diflorasone Diacetate             | 46.7986025  |
| Epirizole                         | 46.55506608 |
| Panthenol (D)                     | 46.17621145 |
| Thiostrepton                      | 45.9234     |

|                                 |             |
|---------------------------------|-------------|
| Diphenhydramine hydrochloride   | 45.52422907 |
| Serotonin hydrochloride         | 45.477      |
| Bisacodyl                       | 44.45       |
| Allantoin                       | 44.26431718 |
| Moroxidine hydrochloride        | 44.2576     |
| Eserine hemisulfate salt        | 43.9392525  |
| Etretinate                      | 43.9392525  |
| Daunorubicin hydrochloride      | 43.37985    |
| Benserazide hydrochloride       | 42.9348     |
| Bromocryptine mesylate          | 42.6174     |
| Efavirenz                       | 41.965      |
| Nicotinamide                    | 41.4657425  |
| Ifosfamide                      | 41.3292     |
| Sulfathiazole                   | 41.18061674 |
| Clemastine fumarate             | 40.26575    |
| Alfacalcidol                    | 39.0473525  |
| Celiprolol HCl                  | 38.7028525  |
| Cefotiam hydrochloride          | 38.6508     |
| Cyclosporin A                   | 38.0975     |
| Pyridylidione                   | 37.5224     |
| (S)-(-)-Atenolol                | 37.4325     |
| Dilazep dihydrochloride         | 36.098175   |
| Isoflupredone acetate           | 34.51982379 |
| Ethinylestradiol 3-methyl ether | 34.0132     |
| Thiethylperazine dimalate       | 33.69700748 |
| Paroxetine Hydrochloride        | 33.6412     |
| Dosulepin hydrochloride         | 32.94525    |
| Molsidomine                     | 32.90805    |
| Zopiclone                       | 32.3640525  |
| Meclocycline sulfosalicylate    | 31.8325     |
| Sulfamonomethoxine              | 31.6572     |
| Bucladesine sodium salt         | 31.372      |
| Etoricoxib                      | 30.0559025  |
| Digoxigenin                     | 29.896      |
| Bromperidol                     | 29.70885    |
| Aniracetam                      | 29.6631725  |
| Lanatoside C                    | 29.471296   |
| Tenoxicam                       | 28.9881     |
| Diethylstilbestrol              | 27.8964     |
| Piracetam                       | 27.7977     |
| Dirithromycin                   | 27.17925    |

|                               |             |
|-------------------------------|-------------|
| Vancomycin hydrochloride      | 25.5285     |
| Sulfasalazine                 | 25.3053     |
| Atracurium besylate           | 25.17180617 |
| Imipenem                      | 24.9054     |
| Colistin sulfate              | 24.4683     |
| Nystatine                     | 23.16165    |
| Mitoxantrone dihydrochloride  | 23.03175    |
| Chlorhexidine                 | 22.6153     |
| Ceftazidime pentahydrate      | 22.4502     |
| Iobenguane sulfate            | 22.4502     |
| Budesonide                    | 22.3758     |
| Artemisinin                   | 22.0503     |
| Trimetazidine dihydrochloride | 21.78525    |
| Mefloquine hydrochloride      | 20.7666     |
| Trolox                        | 20.6925     |
| Xamoterol hemifumarate        | 20.3796     |
| Sisomicin sulfate             | 19.46955    |
| Thiocolchicoside              | 19.251      |
| Mesoridazine besylate         | 18.93945    |
| Sibutramine HCl               | 18.786      |
| Thioridazine hydrochloride    | 18.72246696 |
| Ethamivan                     | 18.5535     |
| Clofilium tosylate            | 18.48035    |
| Tiaprofenic acid              | 18.2931     |
| Chloroquine diphosphate       | 17.3073     |
| Fendiline hydrochloride       | 16.2925     |
| Thonzonium bromide            | 15.5992     |
| Cycloheximide                 | 15.2604     |
| Lovastatin                    | 15.0009     |
| Triflusal                     | 14.77305    |
| Phenindione                   | 14.5731     |
| Avermectin B1a                | 14.056238   |
| Cyclizine hydrochloride       | 13.7826     |
| Gliclazide                    | 13.0014     |
| Fluphenazine dihydrochloride  | 11.49785    |
| Cyanocobalamin                | 11.41       |
| Indatraline hydrochloride     | 10.89721554 |
| Clorsulon                     | 10.5555     |
| DO 897/99                     | 9.64875     |
| Acenocoumarol                 | 9.2721      |
| Primaquine diphosphate        | 9.2575      |

|                                            |             |
|--------------------------------------------|-------------|
| Trifluoperazine dihydrochloride            | 8.70485     |
| Prochlorperazine dimaleate                 | 6.93146     |
| Verteporfin                                | 6.265586035 |
| Propidium iodide                           | 6.0912      |
| Parthenolide                               | 5.31495     |
| R(-) Apomorphine hydrochloride hemihydrate | 4.726       |
| Prenylamine lactate                        | 4.0176      |
| Benzethonium chloride                      | 2.184231887 |
| Chicago sky blue 6B                        | 2.17        |
| Alexidine dihydrochloride                  | 1.1664      |
| Methyl benzethonium chloride               | 0.954713537 |
| Auranofin                                  | 0.9052      |
| Glimepiride                                | 0           |
| Sulfabenzamide                             | 0           |
| Perhexiline maleate                        | -0.3724     |
